# Supplementary material
Source: PubMed Central journal article supplement (PMC4286535)
Supplement: NIHMS638602-supplement-1.pdf [file NIHMS638602-supplement-1.pdf]

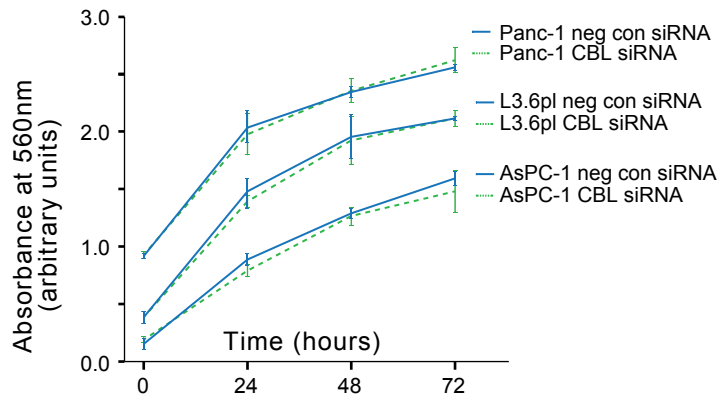

**Figure S1.** CBL knockdown does not enhance baseline cell viability. Knockdown of CBL in Panc-1, L3.6pl and AsPC-1 cell lines versus their respective parental isogenic line showed no difference in cell viability as assessed by MTT assays. The results for serum-supplemented media (10% FBS) are shown, but were no different when grown in serum-free culture. Error bars  $\pm$  SD.

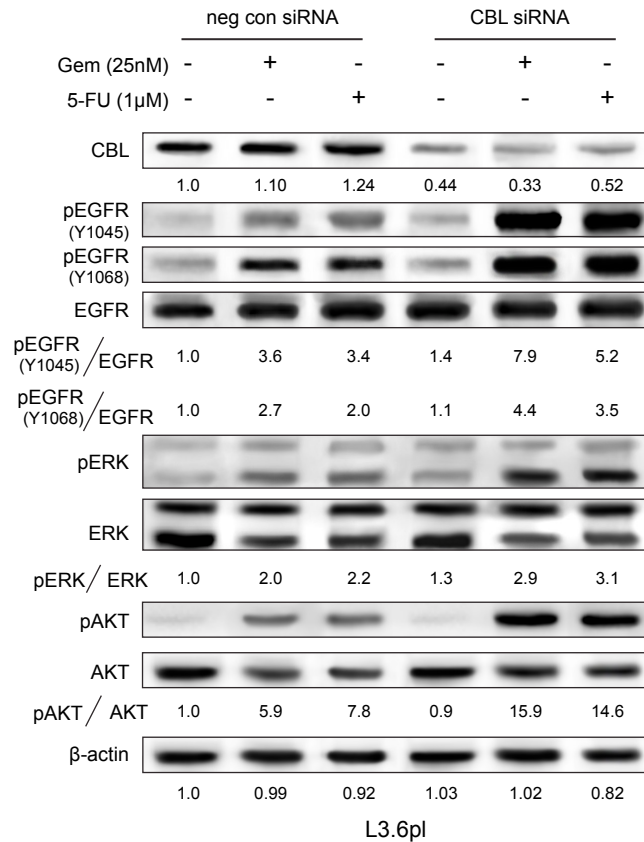

**Figure S2.** Low CBL enhances EGFR autoactivation when treated with chemotherapy. In serum-free conditions, addition of gemcitabine (Gem) or 5-fluorouracil (5-FU) results in autoactivation of EGFR with corresponding increased signaling through downstream ERK and AKT (column 1 vs. 2 and 3). This chemotherapy-induced autoactivation of EGFR at Y1068, a major autophosphorylation site, and Y1045, the CBL binding residue, is further enhanced in L3.6pl<sup>CBL-low</sup> cells (columns 3 and 4 vs. 5 and 6). This is a similar pattern to Panc-1<sup>CBL-low</sup> cells treated under the same conditions suggesting a generalizability of this chemoresistance mechanism in PDAC. Relative densitometry values using  $\beta$ -actin as a loading control are reported below each band.

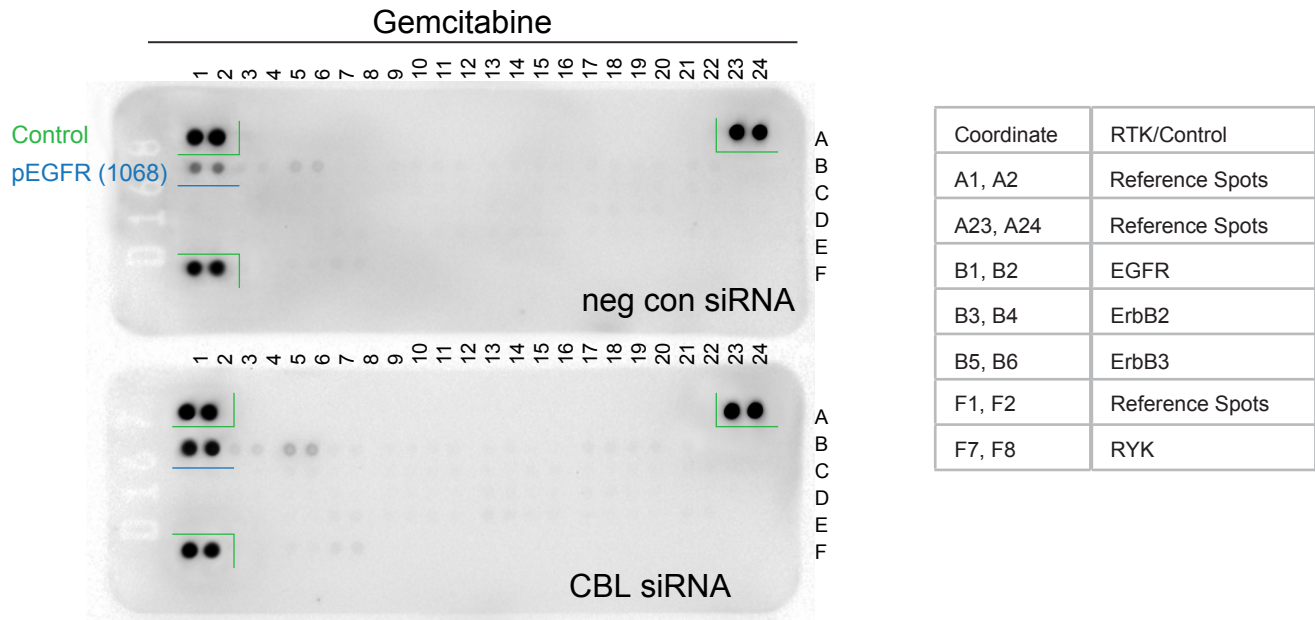

**Figure S3.** A human phospho-receptor tyrosine kinase (pRTK) array reveals that EGFR is highly activated when L3.6pl CBL knockdown cells are treated with gemcitabine. L3.6pl<sup>CBL-low</sup> versus their isogenic parental cell line were incubated in serum-free media containing gemcitabine for 48 hours and then cell lysates were analyzed by immunoblot on a human pRTK array. pEGFR (B1,B2) was increased by greater than 2-fold. The table on the right identifies those pRTKs that had significant signal above background at 60 seconds chemiluminescent exposure.

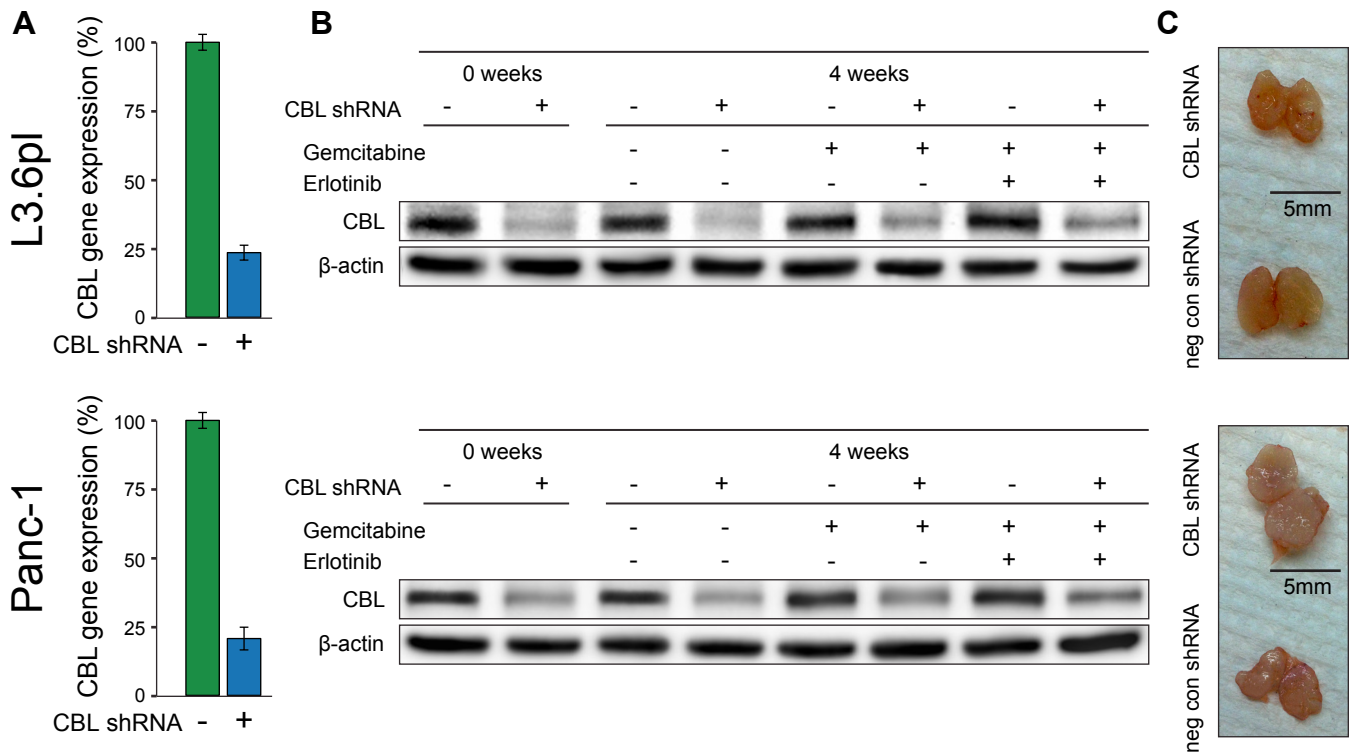

**Figure S4.** shRNA knockdown of CBL in PDAC cells. A, qRT-PCR of PDAC cells (L3.6pl and Panc-1) transduced with CBL shRNA versus neg control shRNA lentivirus revealed a  $\approx 75\%$  knockdown efficiency. Error bars  $\pm$  SD. B, Western blot analysis of cells at the time of injection in NOD-*scid*-*IL2 $\gamma$ <sup>null</sup>* mice and again ex vivo at 4 weeks confirmed stable CBL knockdown and no difference in expression profiles between treatment groups. C, Subcutaneous tumors excised at the start of chemotherapy are grossly similar.

|             |                                                                                   | L3.6pl subcutaneous xenografts                                                    |                                                                                    |   |   |   |  |
|-------------|-----------------------------------------------------------------------------------|-----------------------------------------------------------------------------------|------------------------------------------------------------------------------------|---|---|---|--|
| CBL shRNA   | -                                                                                 | +                                                                                 | -                                                                                  | + | - | + |  |
|             |  |  |  |   |   |   |  |
| Gemcitabine | -                                                                                 | -                                                                                 | +                                                                                  | + | + | + |  |
| Erlotinib   | -                                                                                 | -                                                                                 | -                                                                                  | - | + | + |  |

**Figure S5.** Erlotinib and gemcitabine have synergistic effects on the growth of CBL-low tumors. Necropsy of NOD-*scid-IL2 $\gamma$ <sup>null</sup>* mice at 4 weeks after injection reveals that while CBL shRNA knockdown tumors are Gemcitabine resistant (middle photograph, picture right > left) this resistance is targeted by the addition of an EGFR inhibitor (right photograph, picture right = left). As in the MTT assays, there was no difference in baseline cell viability in the absence of chemotherapy treatment (left photograph, picture right = left).
